# Supplementary material for: International electronic health record-derived COVID-19 clinical course profiles: the 4CE consortium
Source: PubMed Central journal article supplement (PMC7438496; doi:10.1038/s41746-020-00308-0), 2020-08-19
Supplement: 41746_2020_308_MOESM1_ESM.pdf [file 41746_2020_308_MOESM1_ESM.pdf]

# Supplementary Material

## Author Contributions

| First Name | Last Name           | Conception or design of the work | Acquisition of data | Analysis or Interpretation of data | Drafting Manuscript | Approval |
|------------|---------------------|----------------------------------|---------------------|------------------------------------|---------------------|----------|
| Isaac      | Kohane              | x                                | x                   | x                                  | x                   | x        |
| Tianxi     | Cai                 | x                                | x                   | x                                  | x                   | x        |
| Gabriel    | Brat                | x                                | x                   | x                                  | x                   | x        |
| Paul       | Avillach            | x                                | x                   | x                                  | x                   | x        |
| Griffin    | Weber               | x                                | x                   | x                                  | x                   | x        |
| Kenneth    | Mandl               | x                                | x                   |                                    | x                   | x        |
| Nathan     | Palmer              | x                                |                     | x                                  | x                   | x        |
| Riccardo   | Bellazzi            | x                                | x                   |                                    | x                   | x        |
| Luca       | Chiovato            |                                  | x                   |                                    | x                   | x        |
| Valentina  | Tibollo             |                                  | x                   | x                                  | x                   | x        |
| Alberto    | Malovini            |                                  | x                   | x                                  | x                   | x        |
| Lav        | Patel               |                                  | x                   | x                                  | x                   | x        |
| Lemuel     | Waitman             |                                  | x                   | x                                  | x                   | x        |
| Shawn      | Murphy              |                                  |                     | x                                  | x                   | x        |
| Jeffrey    | Klann               |                                  | x                   | x                                  | x                   | x        |
| Nils       | Gehlenborg          | x                                |                     | x                                  | x                   | x        |
| Sehi       | L'Yi                |                                  |                     | x                                  | x                   | x        |
| Mark       | Keller              |                                  |                     | x                                  | x                   | x        |
| Gilbert    | Omenn               | x                                |                     | x                                  | x                   | x        |
| David      | Hanauer             |                                  | x                   | x                                  | x                   | x        |
| Arnaud     | Serret-Larmande     |                                  |                     | x                                  | x                   | x        |
| Alba       | Gutiérrez-Sacristán |                                  |                     | x                                  | x                   | x        |
| John       | Holmes              |                                  |                     | x                                  | x                   | x        |
| Douglas    | Bell                |                                  |                     | x                                  | x                   | x        |

|           |                |  |   |   |   |   |
|-----------|----------------|--|---|---|---|---|
| Robert    | Follett        |  |   | x | x | x |
| Douglas   | Murad          |  |   | x | x | x |
| Luigia    | Scudeller      |  |   | x | x | x |
| Mauro     | Bucalo         |  | x | x | x | x |
| Katie     | Kirchoff       |  | x |   | x | x |
| Jean      | Craig          |  | x |   | x | x |
| Jihad     | Obeid          |  | x |   | x | x |
| Vianney   | Jouhet         |  | x |   | x | x |
| Romain    | Griffier       |  | x | x | x | x |
| Sébastien | Cossin         |  | x | x | x | x |
| Bertrand  | Moal           |  | x | x | x | x |
| Hans      | Prokosch       |  | x |   | x | x |
| Detlef    | Kraska         |  | x |   | x | x |
| Piotr     | Sliz           |  | x |   | x | x |
| Amelia    | Tan            |  | x | x | x | x |
| Kee Yuan  | Ngiam          |  | x | x | x | x |
| Antonio   | Bellasi        |  | x |   | x | x |
| Alberto   | Zambelli       |  | x |   | x | x |
| Brett     | Beaulieu-Jones |  | x | x | x | x |
| Danielle  | Mowery         |  | x |   | x | x |
| Emily     | Schiver        |  | x |   | x | x |
| Jason     | Moore          |  | x | x | x | x |
| Batsal    | Devkota        |  | x |   | x | x |
| Robert    | Bradford       |  | x | x | x | x |
| Mohamad   | Daniar         |  | x |   | x | x |
| Christel  | Daniel         |  | x | x | x | x |
| Vincent   | Benoit         |  | x |   | x | x |
| Romain    | Bey            |  | x |   | x | x |
| Nicolas   | Paris          |  | x | x | x | x |
| Patricia  | Serre          |  | x | x | x | x |
| Nina      | Orlova         |  | x | x | x | x |

|                |            |  |   |   |   |   |
|----------------|------------|--|---|---|---|---|
| Julien         | Dubiel     |  | x |   | x | x |
| Martin         | Hilka      |  | x |   | x | x |
| Anne<br>Sophie | Jannot     |  | x | x | x | x |
| Stéphane       | Bréant     |  | x |   | x | x |
| Judith         | Leblanc    |  | x |   | x | x |
| Nicolas        | Griffon    |  | x |   | x | x |
| Anita          | Burgun     |  | x | x | x | x |
| Mérodie        | Bernaux    |  | x | x | x | x |
| Arnaud         | Sandrin    |  | x | x | x | x |
| Elisa          | Salamanca  |  | x | x | x | x |
| Sylvie         | Cormont    |  | x | x | x | x |
| Thomas         | Ganslandt  |  | x |   | x | x |
| Tobias         | Gradinger  |  | x |   | x | x |
| Julien         | Champ      |  | x | x | x | x |
| Martin         | Boeker     |  | x |   | x | x |
| Patricia       | Martel     |  | x | x | x | x |
| Loic           | Esteve     |  | x | x | x | x |
| Alexandre      | Gramfort   |  | x | x | x | x |
| Olivier        | Grisel     |  | x | x | x | x |
| Guillaume      | Lemaitre   |  | x | x | x | x |
| Damien         | Leprovost  |  | x | x | x | x |
| Thomas         | Moreau     |  | x | x | x | x |
| Gael           | Varoquaux  |  | x | x | x | x |
| Jill Jen       | Vie        |  | x | x | x | x |
| Demian         | Wassermann |  | x | x | x | x |
| Arthur         | Mensch     |  | x | x | x | x |
| Charlotte      | Caucheteux |  | x | x | x | x |
| Christian      | Haverkamp  |  | x | x | x | x |
| James          | Cimino     |  |   | x | x | x |
| Ian            | Krantz     |  | x |   | x | x |
